# Supplementary material for: Nutritional Quality of Plant-Based Cheese Available in Spanish Supermarkets: How Do They Compare to Dairy Cheese?
Source: MDPI journal article supplement (doi:10.3390/nu13093291), 2021-09-21
Supplement: s1 [file s1]

Supplementary Table S1. Main ingredient, format, calories and nutritional content per 100 g of plant-based cheese alternatives

| Product id | Main ingredient | Format  | Calories (kcal) | Total fats (g) | Saturated fats (g) | Carbohydrates (g) | Sugars (g) | Fibre (g) | Protein (g) | Salt (g) |
|------------|-----------------|---------|-----------------|----------------|--------------------|-------------------|------------|-----------|-------------|----------|
| 1          | Coconut oil     | Grated  | 298             | 24.0           | 22.0               | 21.0              | 0.0        | 0.0       | 0.0         | 2.2      |
| 2          | Coconut oil     | Block   | 305             | 29.0           | 26.0               | 11.0              | 0.0        | 0.0       | 0.0         | 1.7      |
| 3          | Coconut oil     | Grated  | 304             | 22.9           | 19.0               | 21.7              | 0.2        | 4.0       | 0.7         | 1.8      |
| 4          | Coconut oil     | Block   | 303             | 21.5           | 17.6               | 26.4              | 3.1        | 0.5       | 1.0         | 1.5      |
| 5          | Coconut oil     | Block   | 297             | 20.8           | 17.4               | 23.7              | 0.0        | 5.9       | 0.5         | 1.8      |
| 6          | Coconut oil     | Block   | 303             | 24.4           | 20.9               | 19.5              | 0.1        | 1.5       | 0.5         | 1.6      |
| 7          | Coconut oil     | Slices  | 288             | 21.9           | 21.2               | 20.7              | 0.2        | 0.0       | 2.2         | 1.0      |
| 8          | Coconut oil     | Slices  | 288             | 21.9           | 21.2               | 20.7              | 0.2        | 0.0       | 2.2         | 1.0      |
| 9          | Coconut oil     | Slices  | 293             | 23.0           | 20.0               | 20.0              | 0.0        | 0.0       | 1.4         | 2.0      |
| 10         | Coconut oil     | Slices  | 285             | 23.0           | 21.0               | 20.0              | 0.0        | 0.0       | 0.0         | 2.3      |
| 11         | Coconut oil     | Slices  | 285             | 23.0           | 21.0               | 20.0              | 0.0        | 0.0       | 0.0         | 2.3      |
| 12         | Coconut oil     | Slices  | 290             | 23.0           | 21.0               | 21.0              | 1.2        | 0.0       | 0.5         | 2.3      |
| 13         | Coconut oil     | Block   | 276             | 25.3           | 16.0               | 6.1               | 0.4        | 5.4       | 0.0         | 1.5      |
| 14         | Coconut oil     | Block   | 327             | 26.8           | 21.5               | 18.6              | 0.5        | 4.7       | 0.4         | 1.5      |
| 15         | Coconut oil     | Grated  | 267             | 16.7           | 8.3                | 26.7              | 0.0        | 0.0       | 0.0         | 2.0      |
| 16         | Coconut oil     | Grated  | 267             | 16.7           | 10.0               | 26.7              | 0.0        | 0.0       | 0.0         | 1.9      |
| 17         | Coconut oil     | Grated  | 313             | 25.9           | 21.6               | 18.3              | 0.0        | 3.2       | 0.0         | 1.6      |
| 18         | Coconut oil     | Grated  | 280             | 20.6           | 19.9               | 22.6              | 0.2        | 0.0       | 1.6         | 1.0      |
| 19         | Coconut oil     | Grated  | 240             | 17.0           | 16.6               | 20.0              | 0.2        | 0.0       | 1.6         | 1.0      |
| 20         | Coconut oil     | Slices  | 273             | 22.7           | 18.2               | 18.2              | 0.0        | 0.0       | 0.0         | 1.9      |
| 21         | Coconut oil     | Spreads | 267             | 23.3           | 15.0               | 13.3              | 0.0        | 0.0       | 0.0         | 1.0      |
| 22         | Coconut oil     | Spreads | 200             | 16.7           | 15.0               | 13.3              | 0.0        | 0.0       | 0.0         | 1.6      |
| 23         | Coconut oil     | Spreads | 290             | 28.8           | 24.2               | 3.9               | 0.6        | 1.3       | 3.4         | 1.3      |
| 24         | Coconut oil     | Spreads | 283             | 27.6           | 23.4               | 5.2               | 1.0        | 1.8       | 2.5         | 1.0      |
| 25         | Coconut oil     | Spreads | 286             | 28.0           | 23.0               | 1.3               | 1.1        | 2.2       | 6.0         | 1.2      |
| 26         | Coconut oil     | Spreads | 246             | 25.0           | 23.0               | 6.0               | 0.2        | 0.0       | 0.2         | 1.5      |
| 27         | Coconut oil     | Spreads | 239             | 23.0           | 21.0               | 8.0               | 0.0        | 0.0       | 0.0         | 1.2      |
| 28         | Coconut oil     | Block   | 311             | 23.7           | 20.0               | 22.7              | 7.1        | 2.1       | 0.6         | 1.5      |

|    |             |        |     |      |      |      |     |     |      |     |
|----|-------------|--------|-----|------|------|------|-----|-----|------|-----|
| 29 | Coconut oil | Block  | 303 | 24.0 | 22.0 | 20.0 | 0.0 | 0.0 | 0.0  | 2.2 |
| 30 | Coconut oil | Block  | 279 | 17.0 | 16.0 | 30.0 | 0.3 | 0.0 | 1.6  | 3.5 |
| 31 | Coconut oil | Slices | 297 | 24.0 | 20.7 | 19.8 | 0.0 | 0.0 | 0.3  | 1.5 |
| 32 | Coconut oil | Slices | 285 | 23.0 | 21.0 | 20.0 | 0.0 | 0.0 | 0.0  | 2.3 |
| 33 | Coconut oil | Grated | 298 | 24.0 | 22.0 | 21.0 | 0.0 | 0.0 | 0.0  | 2.3 |
| 34 | Coconut oil | Slices | 284 | 22.0 | 20.0 | 20.0 | 1.0 | 0.0 | 1.2  | 2.2 |
| 35 | Cashew nuts | Block  | 306 | 21.0 | 4.4  | 17.1 | 3.5 | 2.4 | 11.0 | 0.5 |
| 36 | Cashew nuts | Block  | 328 | 25.0 | 6.3  | 13.3 | 2.7 | 2.7 | 11.0 | 0.6 |
| 37 | Cashew nuts | Block  | 328 | 25.0 | 6.3  | 13.3 | 2.7 | 2.7 | 11.0 | 0.6 |
| 38 | Cashew nuts | Block  | 328 | 25.9 | 5.1  | 11.9 | 2.7 | 2.2 | 10.6 | 0.5 |
| 39 | Tofu        | Block  | 185 | 11.0 | 1.7  | 0.5  | 0.0 | 6.2 | 18.0 | 1.0 |
| 40 | Tofu        | Block  | 185 | 11.0 | 1.7  | 0.5  | 0.0 | 6.2 | 18.0 | 1.0 |

---

Supplementary Table S2. Format, calories and nutritional content per 100 g of different types of dairy cheese

| Type of cheese                                          | Format       | Calories<br>(kcal) | Total fats<br>(g) | Saturated fats<br>(g) | Carbohydrates<br>(g) | Sugars<br>(g) | Fibre<br>(g) | Protein<br>(g) | Salt<br>(g) |
|---------------------------------------------------------|--------------|--------------------|-------------------|-----------------------|----------------------|---------------|--------------|----------------|-------------|
| Blue cheese                                             | Block/slices | 351                | 29.8              | 17.6                  | 0.0                  | 0.0           | 0.0          | 21.1           | 2.0         |
| Brie cheese                                             | Block/slices | 343                | 30.7              | 19.4                  | 0.0                  | 0.0           | 0.0          | 17.2           | 1.5         |
| Goat cheese, cured                                      | Block/slices | 464                | 39.6              | 25.4                  | 0.0                  | 0.0           | 0.0          | 27.6           | 2.0         |
| Cabrales cheese                                         | Block/slices | 377                | 32.6              | 19.4                  | 0.0                  | 0.0           | 0.0          | 21.5           | 2.7         |
| Camembert cheese, 20-30% fidm <sup>a</sup>              | Block/slices | 201                | 11.2              | 7.0                   | 0.0                  | 0.0           | 0.0          | 24.7           | 2.2         |
| Camembert cheese, 60% fidm <sup>a</sup>                 | Block/slices | 350                | 33.1              | 20.7                  | 0.0                  | 0.0           | 0.0          | 13.8           | 1.3         |
| Cheddar cheese                                          | Block/slices | 405                | 33.6              | 21.3                  | 0.1                  | 0.0           | 0.0          | 26.0           | 1.8         |
| Ball cheese                                             | Block/slices | 336                | 28.3              | 17.3                  | 0.0                  | 0.0           | 0.0          | 20.7           | 1.9         |
| Lamb, cow and goat cheese,<br>"Castilla-la Mancha" type | Block/slices | 413                | 35.7              | 23.3                  | 0.0                  | 0.0           | 0.0          | 23.5           | 1.1         |
| Sheep and cow cheese, "Castilla-<br>León" type          | Block/slices | 410                | 35.8              | 23.3                  | 0.0                  | 0.0           | 0.0          | 22.6           | 1.7         |
| Cheese, edam type                                       | Block/slices | 336                | 28.3              | 17.3                  | 0.0                  | 0.0           | 0.0          | 20.7           | 1.1         |
| Emmental cheese                                         | Block/slices | 367                | 28.8              | 17.3                  | 0.0                  | 0.0           | 0.0          | 27.3           | 0.7         |
| Gruyere cheese                                          | Block/slices | 375                | 31.3              | 18.8                  | 0.4                  | 0.0           | 0.0          | 23.4           | 1.1         |
| Cheese, "manchego" type, in oil                         | Block/slices | 467                | 40.5              | 24.5                  | 0.0                  | 0.0           | 0.0          | 26.5           | 1.8         |
| Roquefort cheese                                        | Block/slices | 354                | 32.8              | 20.6                  | 0.0                  | 0.0           | 0.0          | 15.4           | 3.8         |
| Semi-cured cheese                                       | Block/slices | 390                | 30.4              | 18.9                  | 0.5                  | 0.0           | 0.0          | 29.0           | 1.7         |
| Fresh cheese                                            | Block/slices | 332                | 25.4              | 13.7                  | 0.0                  | 0.0           | 0.0          | 26.0           | 1.7         |
| Mozzarella cheese                                       | Grated       | 223                | 16.1              | 8.7                   | 0.0                  | 0.0           | 0.0          | 19.5           | 0.9         |
| Parmesan cheese                                         | Grated       | 367                | 26.5              | 16.7                  | 0.0                  | 0.0           | 0.0          | 32.3           | 2.1         |
| Grated cheese                                           | Grated       | 395                | 32.1              | 17.1                  | 0.0                  | 0.0           | 0.0          | 26.9           | 1.5         |
| Cheese spread                                           | Spreads      | 361                | 32.4              | 19.6                  | 2.3                  | 2.3           | 0.0          | 15.6           | 2.3         |
| Cheese spread, with spice and<br>herbs                  | Spreads      | 251                | 23.9              | 14.3                  | 3.1                  | 3.1           | 0.0          | 6.5            | 0.1         |

<sup>a</sup>fidm: fat in dry matter

Supplementary Table S3. Median (minimum-maximum) values of calories and nutritional content in coconut oil-based cheese alternatives per 100g, by selling format

|                   | <b>Block/slices</b><br>n=19 | <b>Grated</b><br>n=8 | <b>Spreads</b><br>n=7 |
|-------------------|-----------------------------|----------------------|-----------------------|
|                   | Median (Min-Max)            | Median (Min-Max)     | Median (Min-Max)      |
| Calories (kcal)   | 290 (273-327)               | 289 (240-313)        | 267 (200-290)         |
| Total fat (g)     | 23.0 (17.0-29.0)            | 21.8 (16.7-25.9)     | 25.0 (16.7-28.8)      |
| Saturated fat (g) | 20.9 (16.0-26.0)            | 19.4 (8.3-22.0)      | 23.0 (15.0-24.2)      |
| Carbohydrate (g)  | 20.0 (6.1-30.0)             | 21.4 (18.3-26.7)     | 6.00 (1.3-13.3)       |
| Sugars (g)        | 0.1 (0.0-7.1)               | 0.0 (0.0-0.2)        | 0.2 (0.0-1.1)         |
| Fibre (g)         | 0.0 (0.0-5.9)               | 0.0 (0.0-4.0)        | 0.0 (0.0-1.1)         |
| Protein (g)       | 0.5 (0.0-2.2)               | 0.0 (0.0-1.6)        | 0.2 (0.0-6.0)         |
| Salt (g)          | 1.8 (1.0-3.5)               | 1.9 (1.0-2.3)        | 1.2 (1.0-1.6)         |
